# Supplementary material for: Kelvin probe force microscopy in liquid using electrochemical force microscopy
Source: publisher site journal article supplement (doi:10.3762/bjnano.6.19), 2015-01-19
Supplement: Additional file 1 [file 2190-4286-6-19-S1.pdf]

# Supporting Information

for

## **Kelvin probe force microscopy in liquid using electrochemical force microscopy**

Liam Collins<sup>1,2</sup>, Stephen Jesse<sup>3</sup>, Jason I. Kilpatrick<sup>2</sup>, Alexander Tselev<sup>3</sup>, M. Baris Okatan<sup>3</sup>,  
Sergei V. Kalinin<sup>3,4</sup> and Brian J. Rodriguez\*<sup>1,2</sup>

Address: <sup>1</sup>School of Physics, University College Dublin, Belfield, Dublin 4, Ireland, <sup>2</sup>Conway  
Institute of Biomolecular and Biomedical Research, University College Dublin, Belfield, Dublin  
4, Ireland, <sup>3</sup>Center for Nanophase Materials Sciences, Oak Ridge National Laboratory, Oak  
Ridge, Tennessee 37831, USA and <sup>4</sup>Institute for Functional Imaging of Materials, Oak Ridge  
National Laboratory, Oak Ridge, Tennessee 37831, USA

Email: Brian J. Rodriguez - [Brian.Rodriguez@ucd.ie](mailto:Brian.Rodriguez@ucd.ie)

\* Corresponding author

## **Additional Figures**

## Double exponent fitting of the transient EcFM mixed response in isopropanol

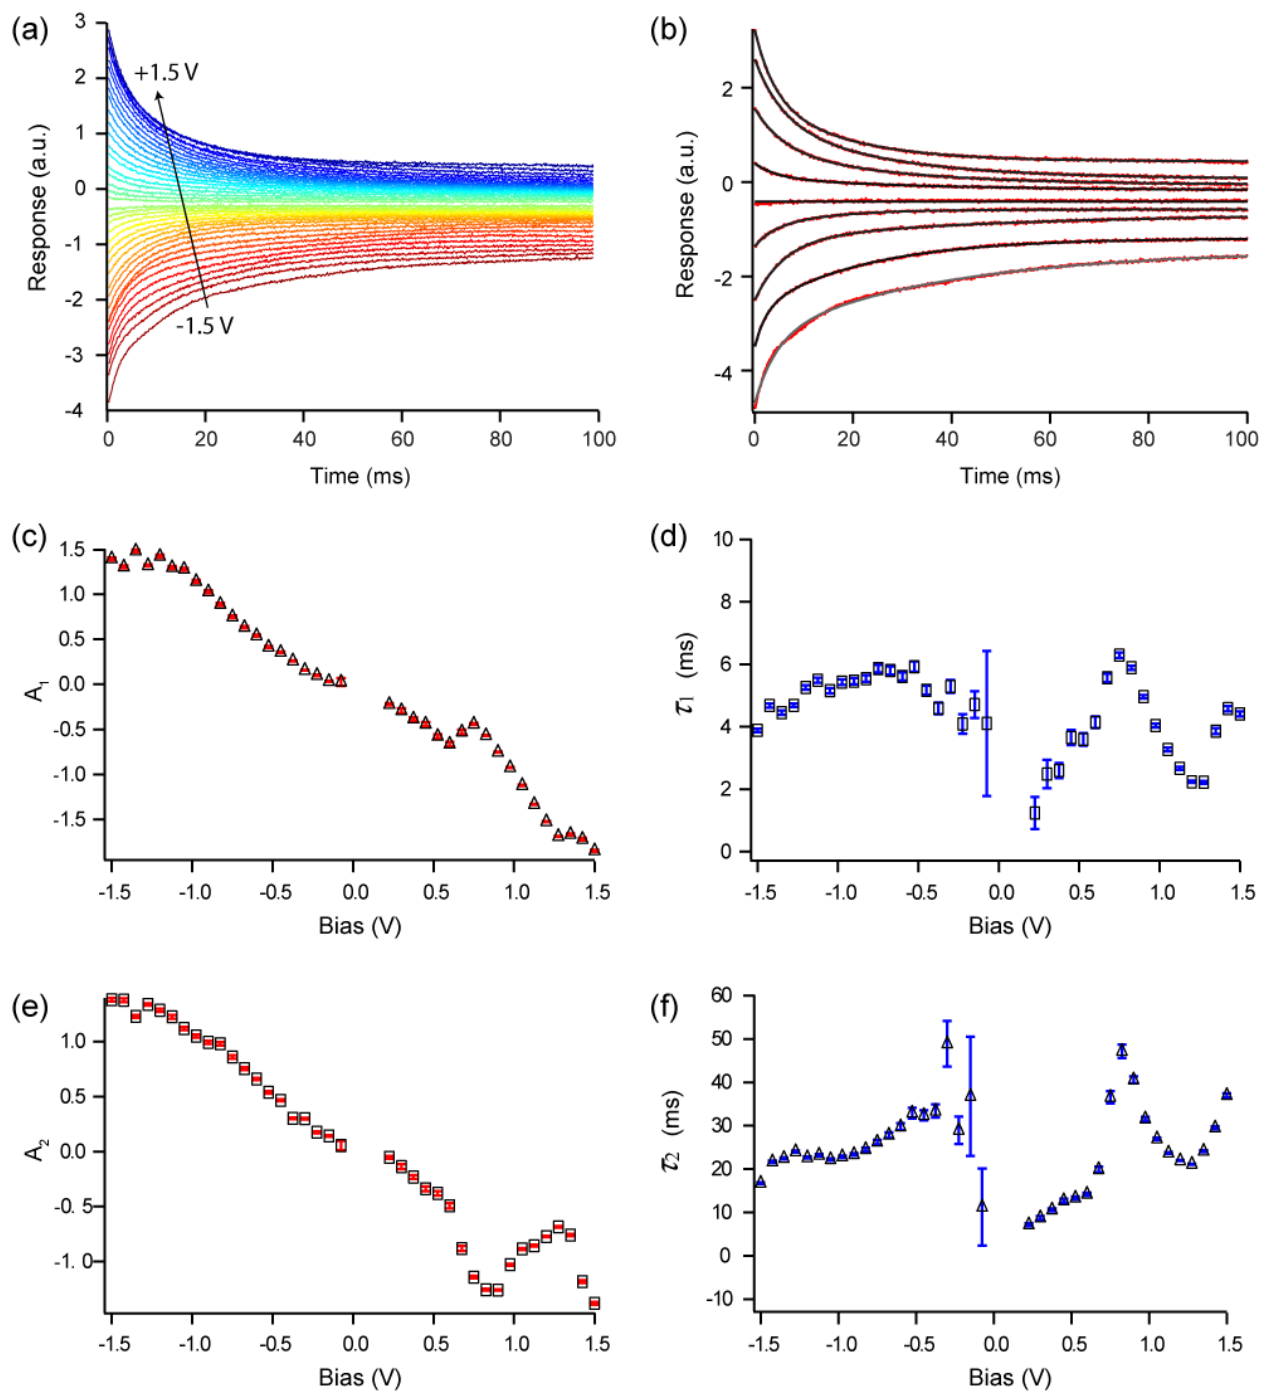

**Figure S1:** (a) Transient time profiles of EcFM  $A_{\omega}^{mixed}$  response [bias-on] collected in isopropanol. (b) A selection of double exponential fits (red) to the experimental data (grey) between  $-1.5$  V and  $+1.5$  V. Bias dependence of the fitting coefficients ( $\pm$  std. dev.) showing (c)  $A_1$  (d)  $\tau_1$  (e)  $A_2$  (f)  $\tau_2$ , where the fitting equation was defined as  $f(x) = y_0 + A_1 e^{-t/\tau_1} + A_2 e^{-t/\tau_2}$ .

## Double exponent fitting of the transient EcFM mixed response in milliQ water

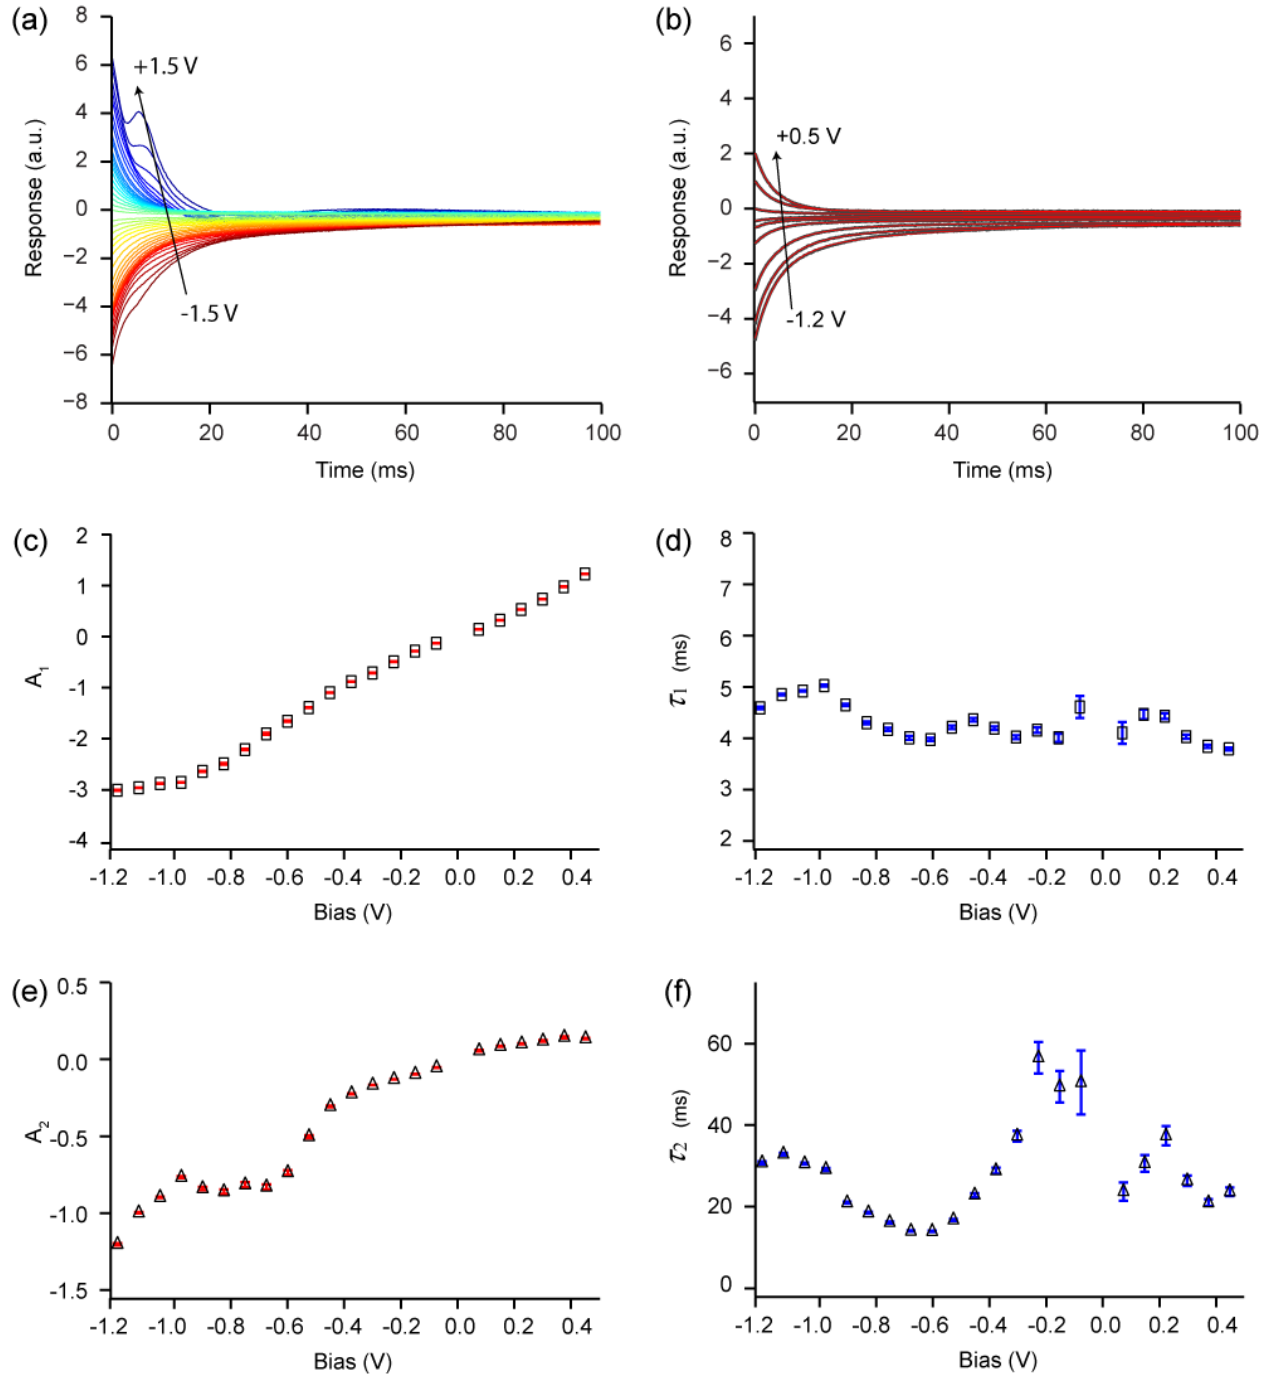

**Figure S2:** (a) Transient time profiles of EcFM  $A_{\omega}^{mixed}$  response [bias-on] collected in milliQ water. (b) A selection of double exponential fits (red) to the experimental data (grey) between  $-1.2$  V and  $+500$  mV. Bias dependence of the fitting coefficients ( $\pm$  std. dev.) showing (c)  $A_1$  (d)  $\tau_1$  (e)  $A_2$  (f)  $\tau_2$ , where the fitting equation was defined as  $f(x) = y_0 + A_1 e^{-t/\tau_1} + A_2 e^{-t/\tau_2}$ .

## Linear fitting of the EcFM mixed response for determination of CPD

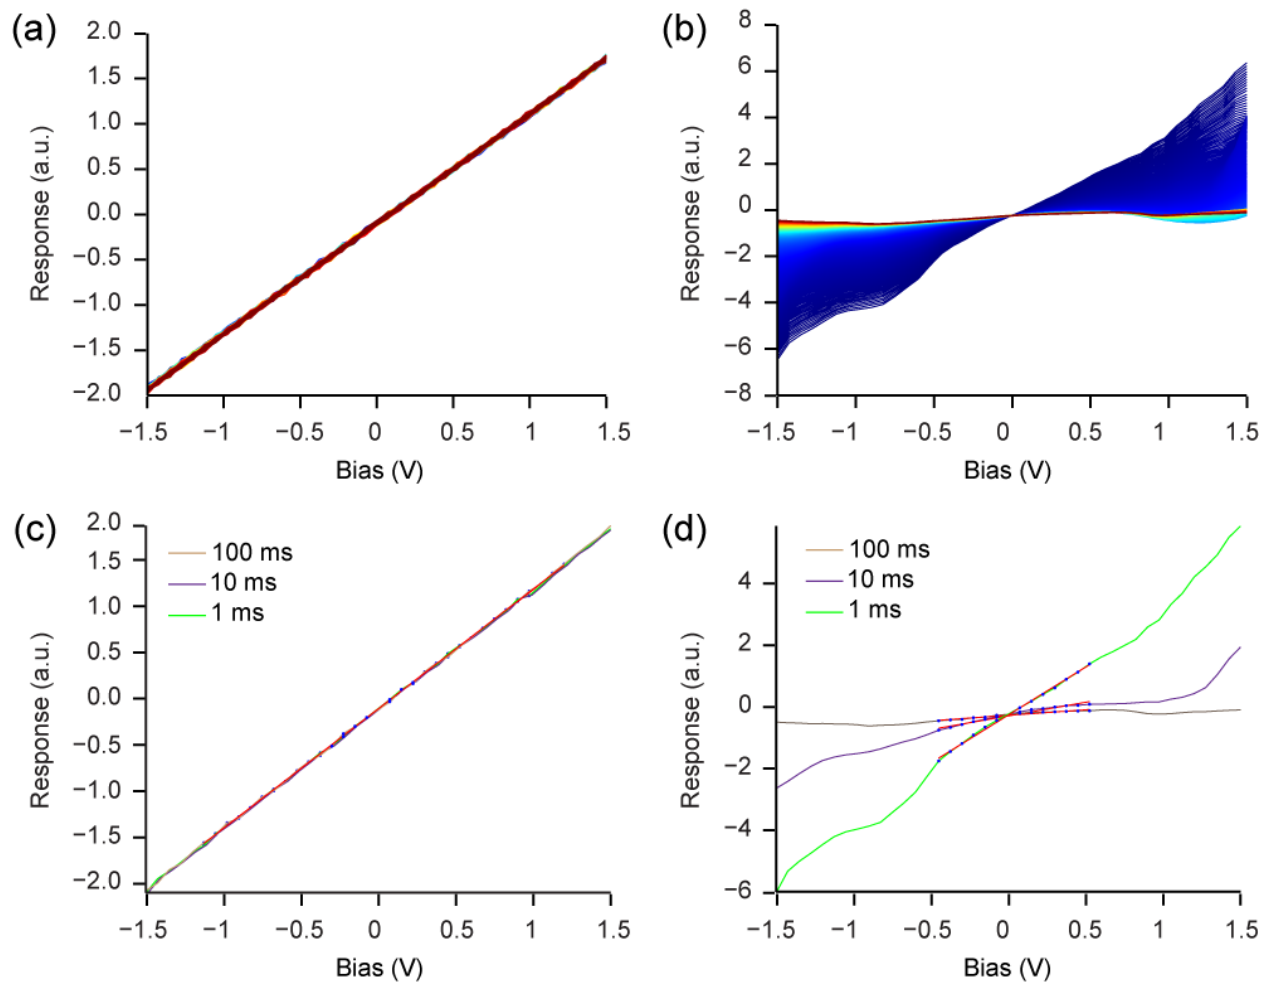

**Figure S3:** EcFM  $A_{\omega}^{mixed}$  response [bias on] recorded 200 nm above a grounded Au electrode in (a) decane and (b) milliQ water, as shown in Fig 3. Corresponding linear fitting for 3 timescales (1, 10 and 100 ms) for (c) decane (full bias range) and (d) milliQ water ( $-500$  to  $+500$  mV).
